# Supplementary material for: Low temperature methanation of CO2 over an amorphous cobalt-based catalyst
Source: Royal Society of Chemistry journal article supplement (doi:10.1039/d0sc06414a), 2021-01-01
Supplement: d0sc06414a1.pdf [file d0sc06414a1.pdf]

## Supplementary Information

### **Low Temperature Methanation of CO<sub>2</sub> over an Amorphous Cobalt-based Catalyst**

Jinghui Tu,<sup>a</sup> Haihong Wu,<sup>a\*</sup> Qingli Qian,<sup>b\*</sup> Shitao Han,<sup>a</sup> Mengen Chu,<sup>a</sup> Shuaiqiang Jia,<sup>a</sup> Ruting Feng,<sup>a</sup> Jianxin Zhai,<sup>a</sup> Mingyuan He,<sup>a</sup> Buxing Han<sup>a,b\*</sup>

[a] Shanghai Key Laboratory of Green Chemistry and Chemical Processes, School of Chemistry and Molecular Engineering, East China Normal University, Shanghai 200062, P. R. China

[b] Beijing National Laboratory for Molecular Sciences, CAS Key Laboratory of Colloid and Interface and Thermodynamics, CAS Research/Education Center for Excellence in Molecular Sciences, Institute of Chemistry, Chinese Academy of Sciences, China

E-mail: hhwu@chem.ecnu.edu.cn; qianql@iccas.ac.cn; hanbx@iccas.ac.cn

## Figures and Tables

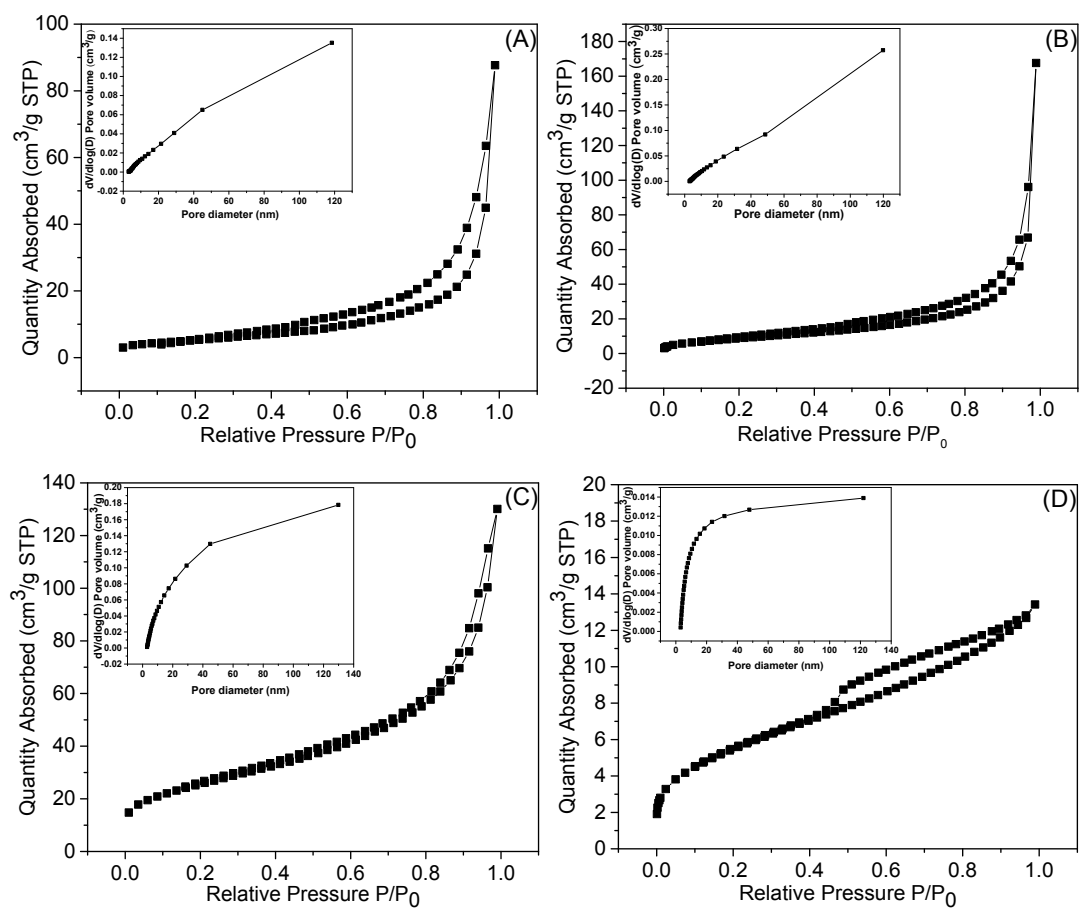

**Figure S1.** The  $N_2$  adsorption isotherm and pore diameter distribution for the catalysts (A) Co-B-O, (B) Co-Zr<sub>0.05</sub>-B-O, (C) Co-Zr<sub>0.1</sub>-B-O, (D) Co-Zr<sub>0.3</sub>-B-O.

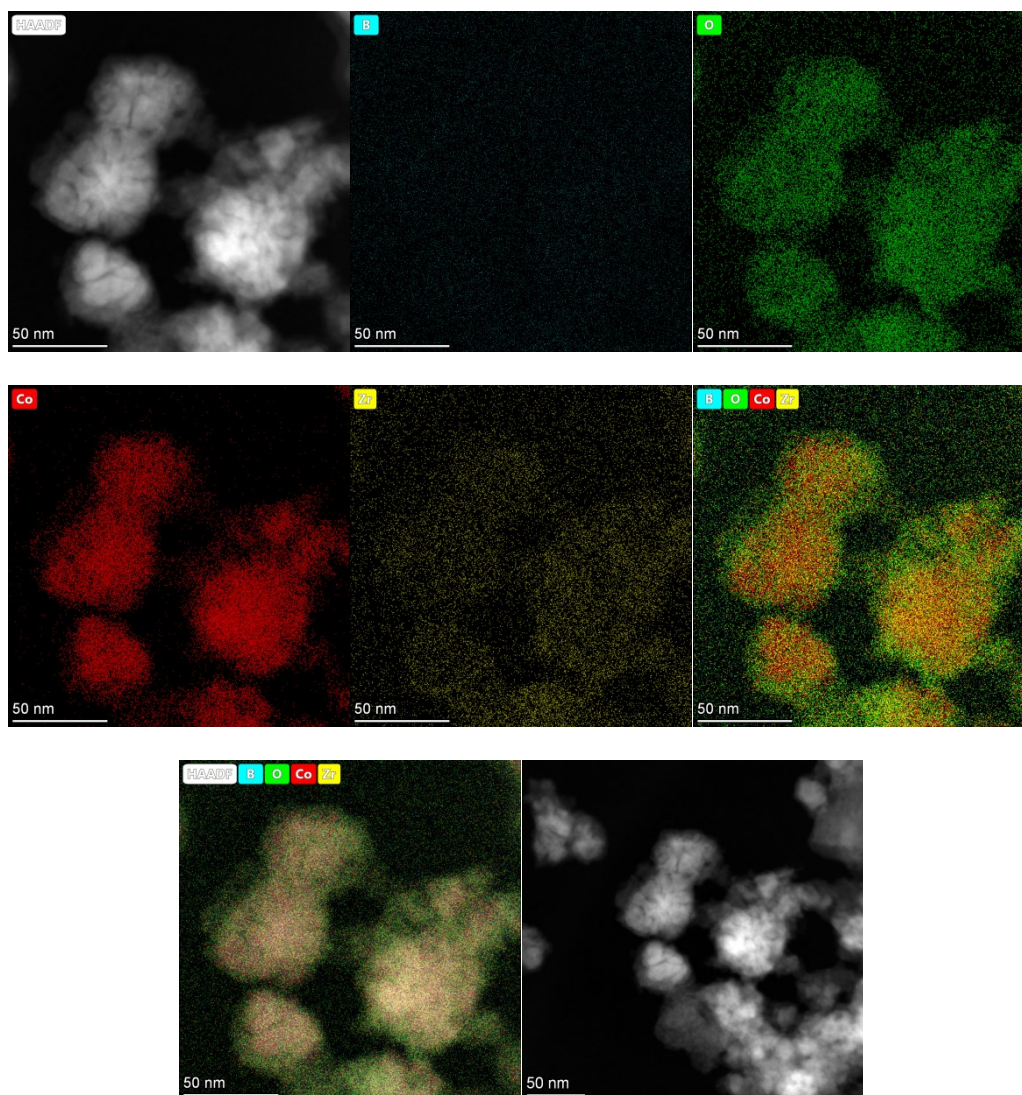

**Figure S2.** The HAADF-STEM images and EDS mapping of B, O, Co and Zr on the Co-Zr<sub>0.1</sub>-B-O catalyst.

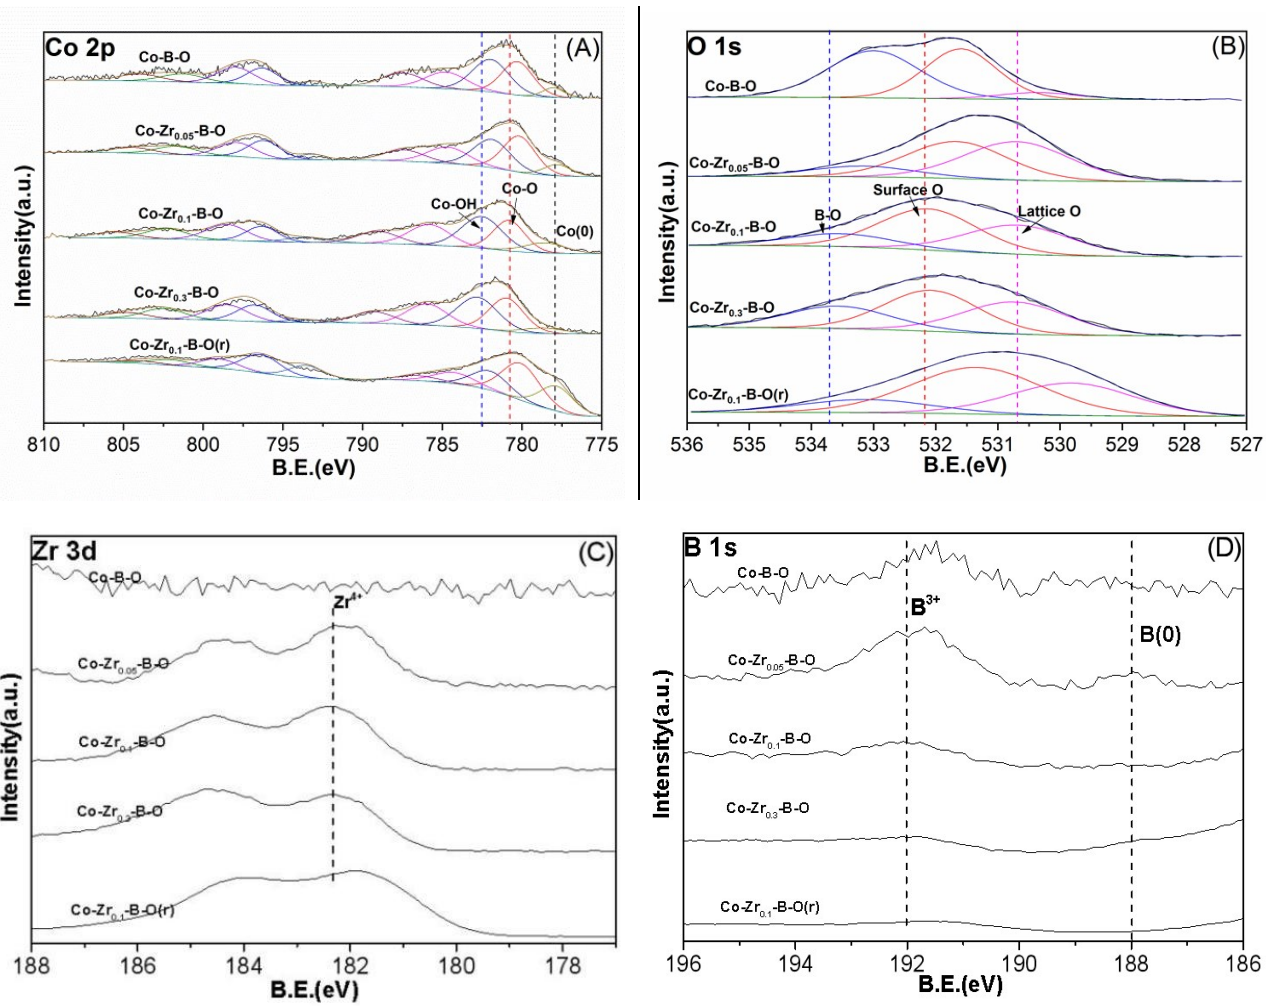

Figure S3 XPS spectra of the Co-Zr<sub>x</sub>-B-O catalysts: (A) Co2p; (B) O1s; (C) Zr3d; (D) B1s. The data were fitted according to literature.<sup>[1]</sup>

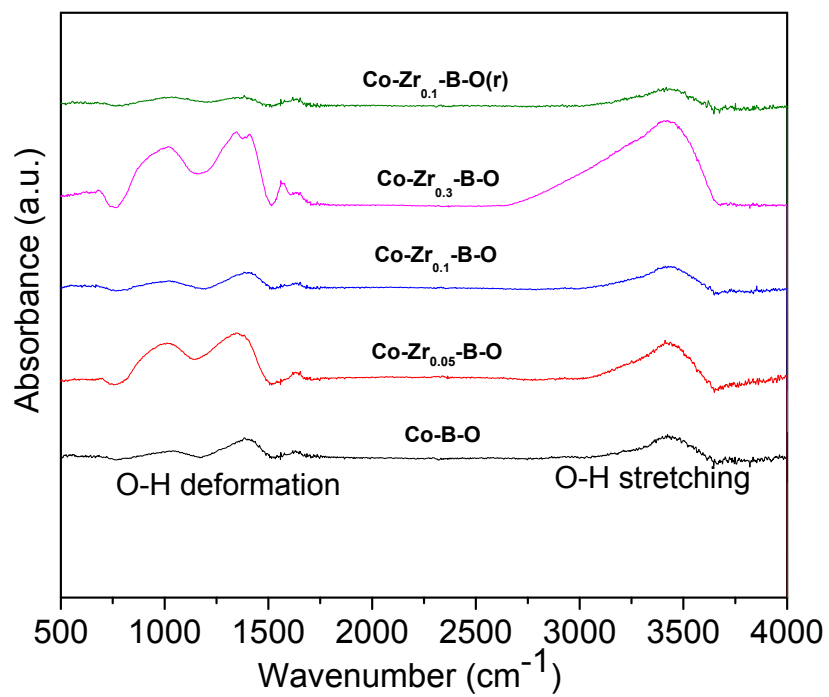

**Figure S4.** The FTIR spectra of the Co-Zr<sub>0.1</sub>-B-O catalysts. The peak positions of O-H deformation and stretching are the same as those in the literature.<sup>[2]</sup>

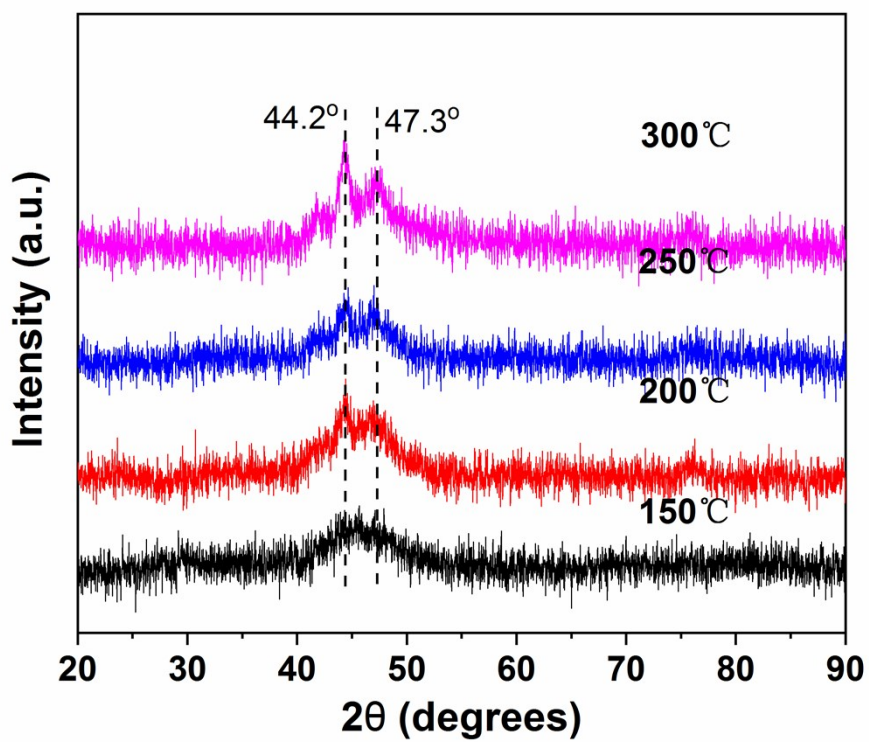

**Figure S5.** The XRD spectra of the Co-Zr<sub>0.1</sub>-B-O catalyst after treating in flowing H<sub>2</sub> at different temperature.

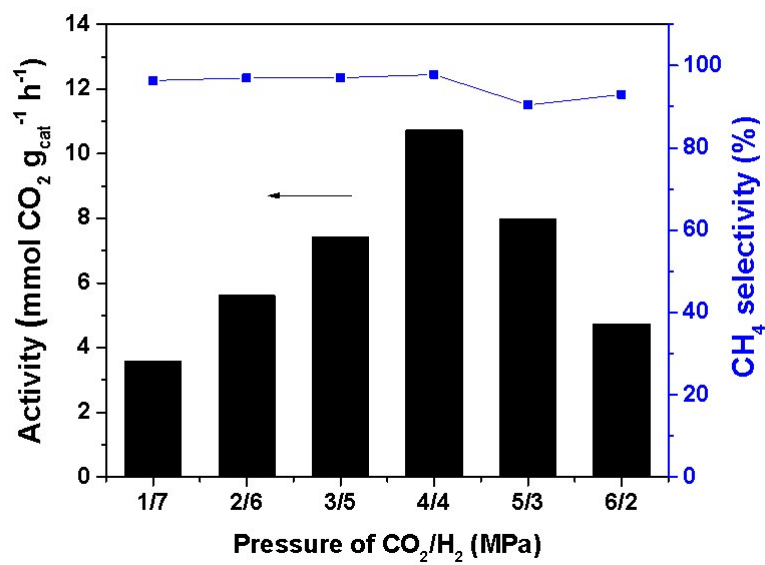

**Figure S6.** Impact of  $P_{CO_2}/P_{H_2}$  ratio upon the reaction. Conditions: Co-Zr<sub>0.1</sub>-B-O catalyst 40 mg, cyclohexane 2 mL, initial pressure 8.0 MPa, 180 °C, 12 h.

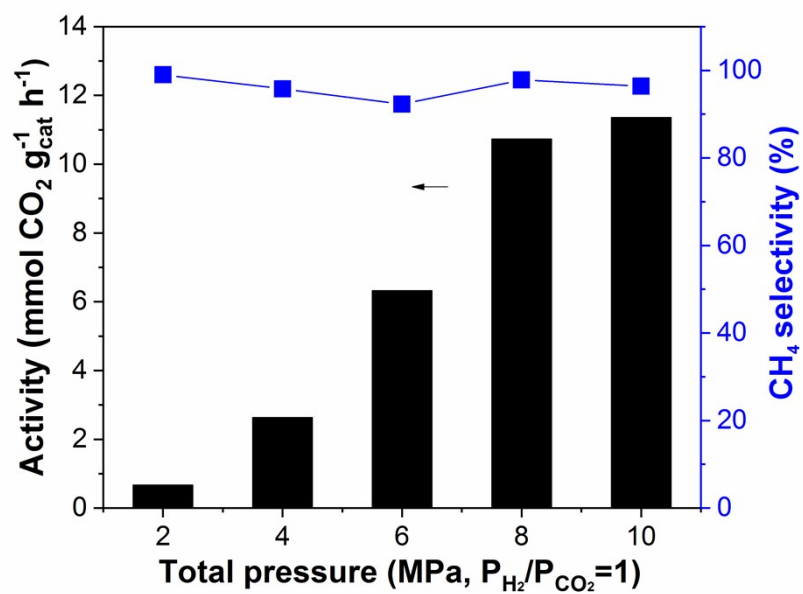

**Figure S7.** Impact of total pressure on the reaction. Conditions: Co-Zr<sub>0.1</sub>-B-O catalyst 40 mg, cyclohexane 2 mL,  $P_{CO_2}/P_{H_2}=1$ , 180 °C, 12 h.



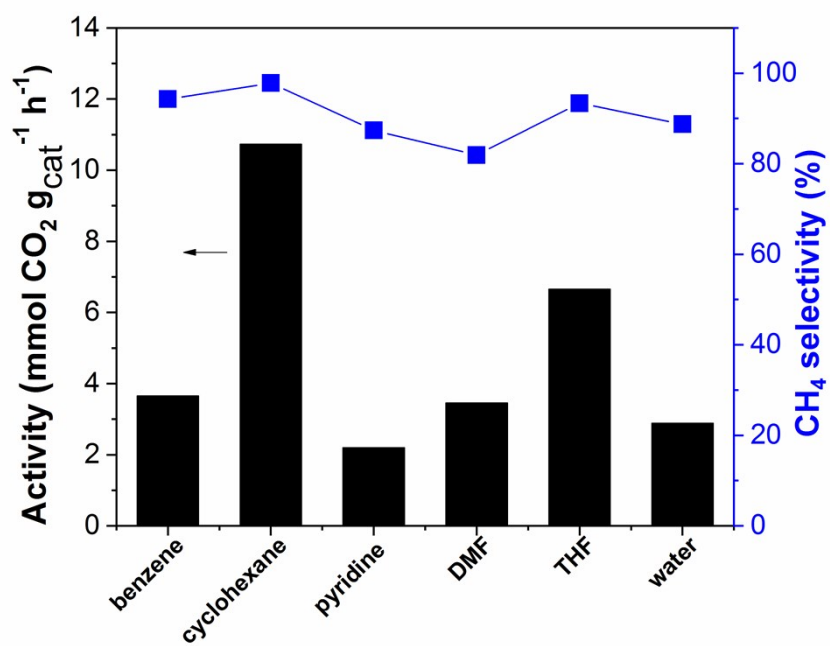

**Figure S8.** The results of the reaction in different solvents. Conditions: Co-Zr<sub>0.1</sub>-B-O catalyst 40 mg, solvent 2 mL, 4 MPa CO<sub>2</sub>, 4 MPa H<sub>2</sub>, 180 °C, 12 h.

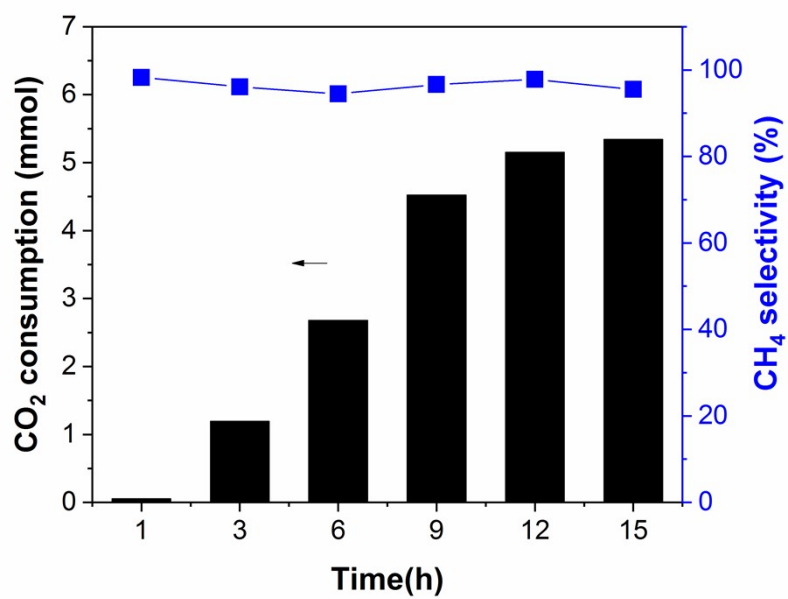

**Figure S9.** Time course of the reaction. Conditions: Co-Zr<sub>0.1</sub>-B-O catalyst 40 mg, cyclohexane 2 mL, 4 MPa CO<sub>2</sub>, 4 MPa H<sub>2</sub>, 180 °C.

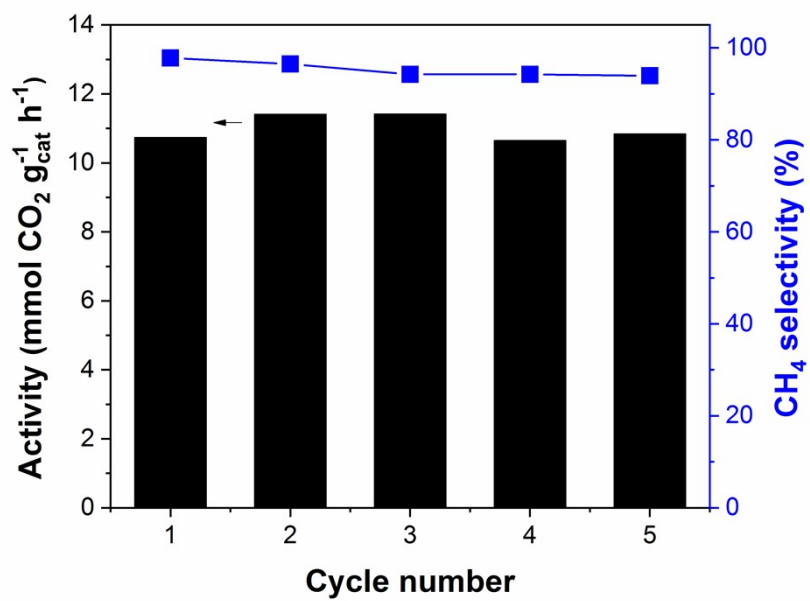

**Figure S10.** Results of the recycling test of the catalyst. Conditions: Co-Zr<sub>0.1</sub>-B-O catalyst 40 mg, cyclohexane 2 mL, 4 MPa CO<sub>2</sub>, 4 MPa H<sub>2</sub>, 180 °C, 12 h.

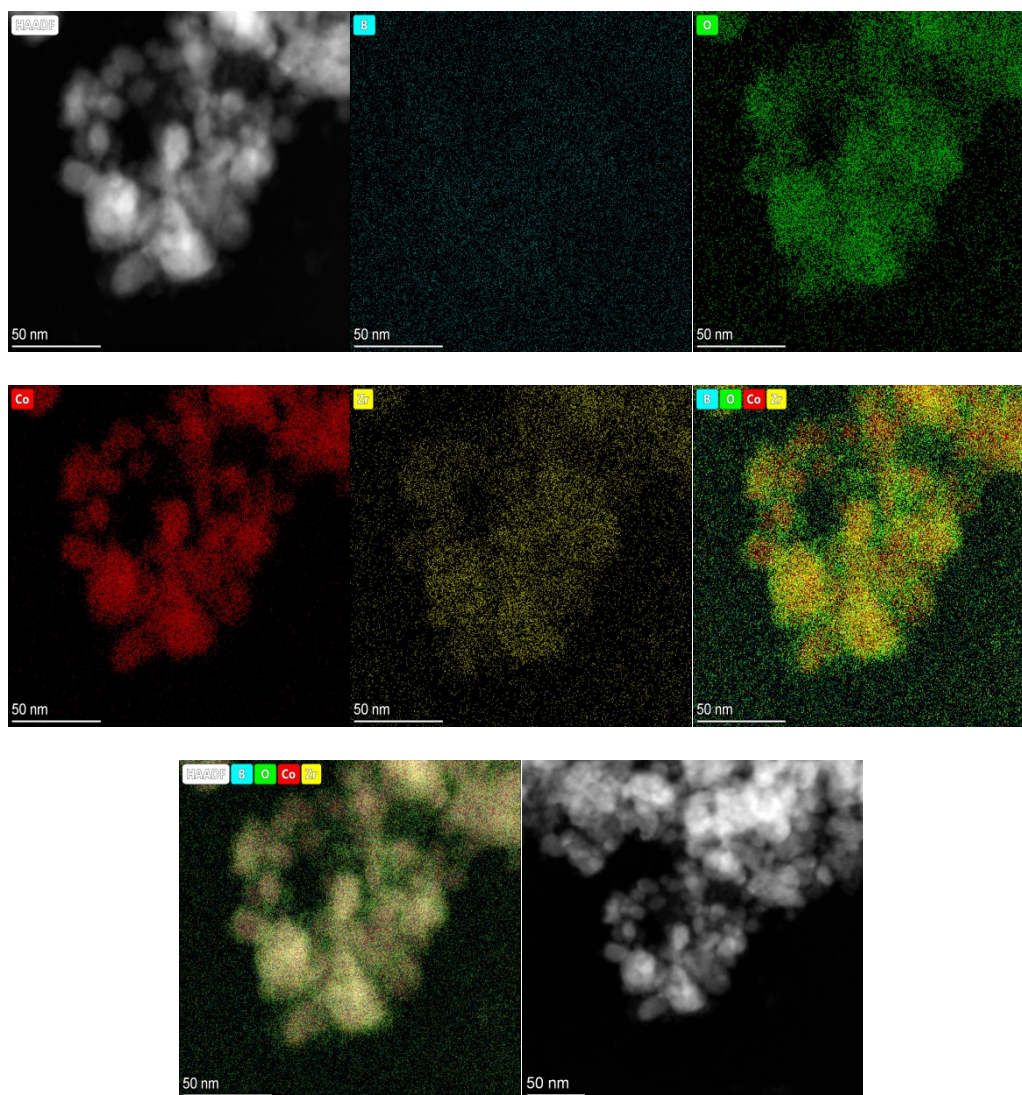

**Figure S11.** The HAADF-STEM images and EDS mapping of B, O, Co and Zr on the catalyst after five cycles.

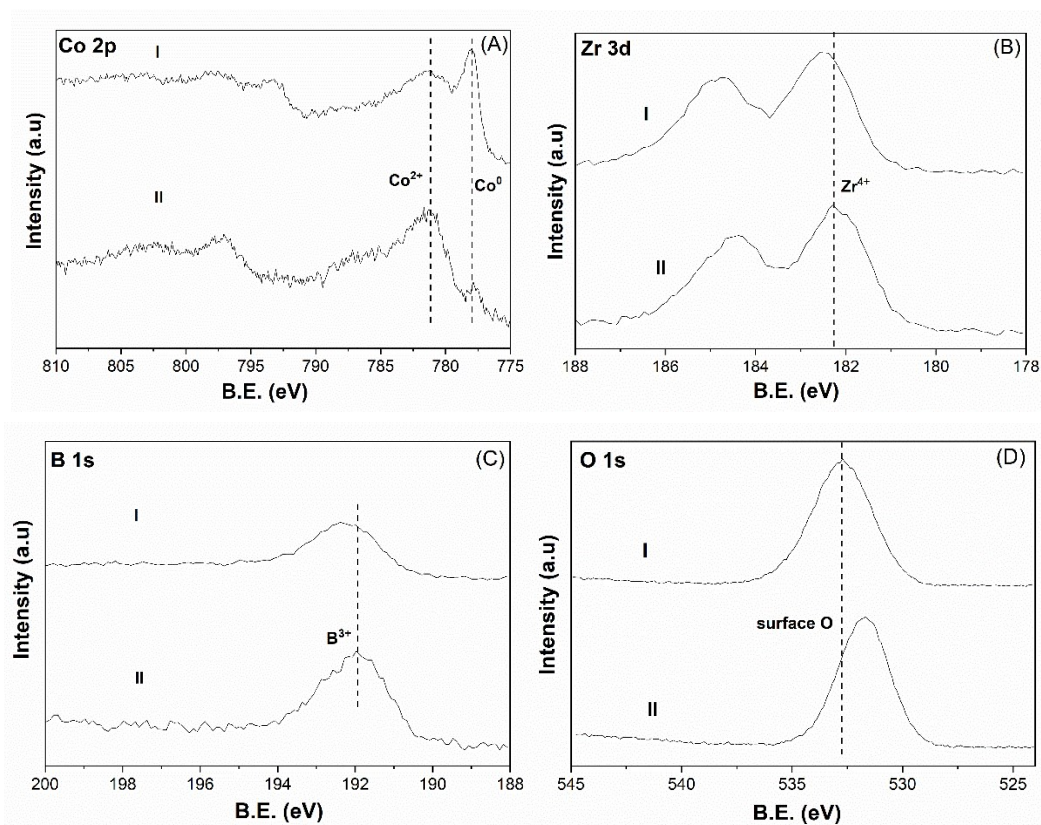

**Figure S12.** XPS characterization of the Co-Zr<sub>0.1</sub>-B-O catalyst after adsorption of H<sub>2</sub> or CO<sub>2</sub> at elevated temperature: (A) Co 2p, (B) Zr 3d, (C) B 1s, (D) O1s.

I: The catalyst was pretreated in a reactor with 4 MPa H<sub>2</sub> at 180 °C for 2 h and then cooled to room temperature;

II: After step I the H<sub>2</sub> was released and replaced by 4 MPa CO<sub>2</sub>, after the reactor was kept at 180 °C for 1 h it was cooled to room temperature.

After the adsorption, the catalyst samples in the reactors were quickly transferred into the chamber of the XPS spectrometer.

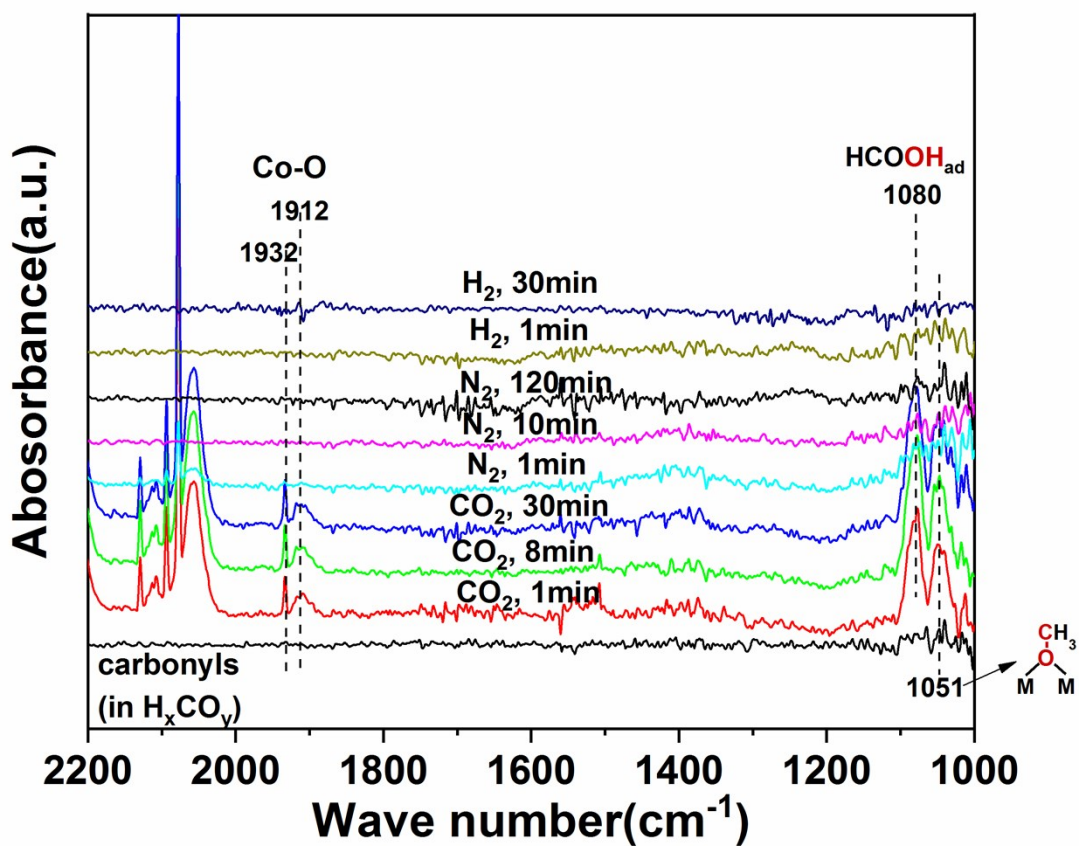

**Figure S13.** In situ FTIR spectra obtained during CO<sub>2</sub> adsorption on the Co-Zr<sub>0.1</sub>-B-O catalyst. The catalyst was pretreated by H<sub>2</sub> at 180 °C for 2 h before the CO<sub>2</sub> adsorption. The black line is the background spectrum scanned before CO<sub>2</sub> was introduced.



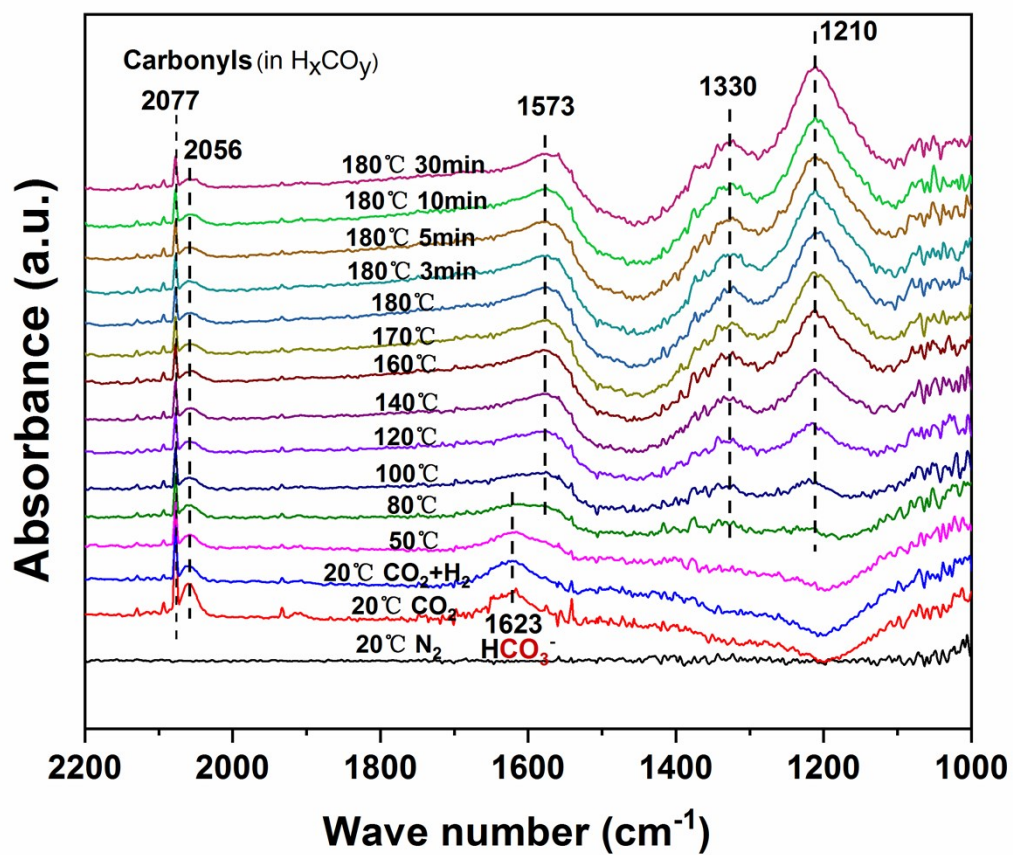

**Figure S14.** In situ FTIR spectra during reaction of  $\text{CO}_2$  and  $\text{H}_2$  over the Co-Zr<sub>0.1</sub>-B-O catalyst. At 20 °C,  $\text{CO}_2$  was firstly added, then  $\text{CO}_2$  and  $\text{H}_2$  were introduced together. The temperature was elevated from 20 to 180 °C at the rate of 5 °C /min and kept at 180 °C for 30 min. The black line is the background spectrum scanned at 20 °C before  $\text{CO}_2$  was introduced.

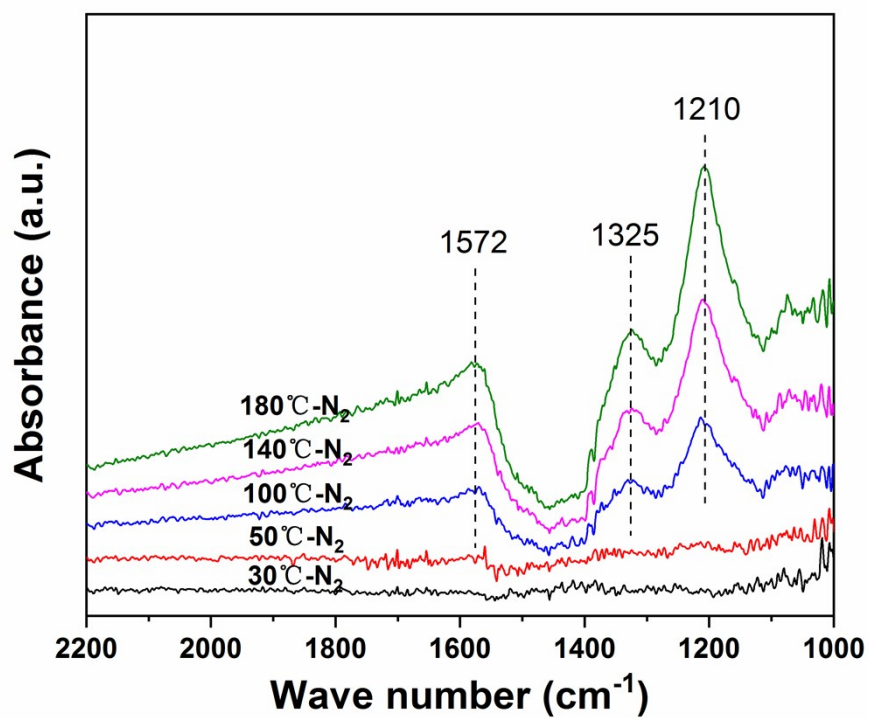

**Figure S15.** In situ FTIR spectra of the Co-Zr<sub>0.1</sub>-B-O catalyst during heating at a rate of 10 °C/min in N<sub>2</sub> flow. The background spectrum was scanned at 30 °C.



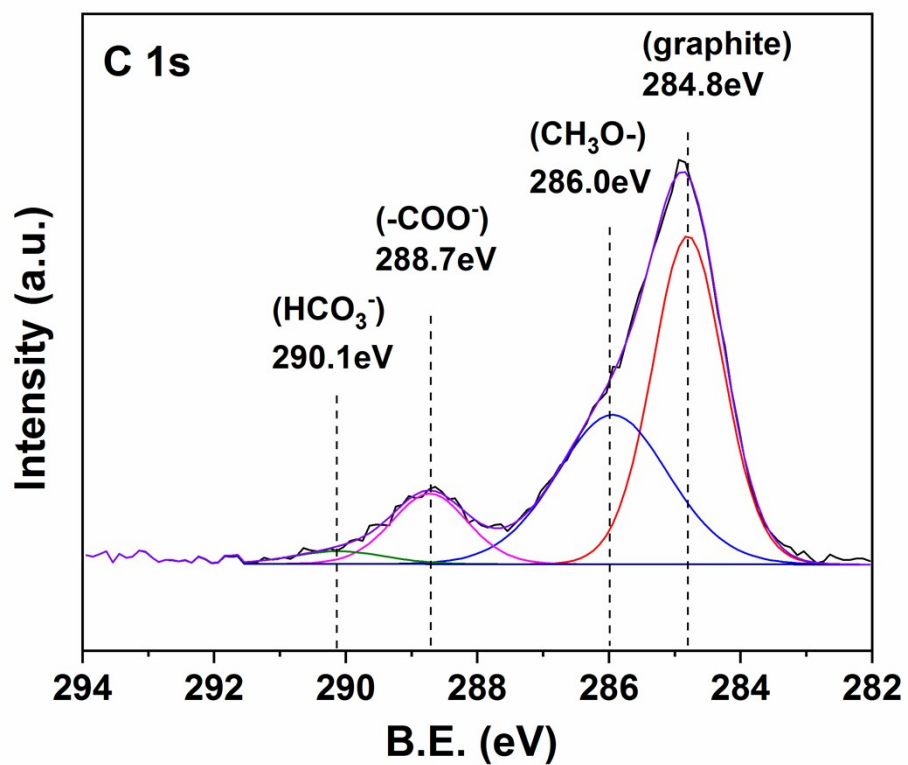

**Figure S16.** XPS characterization of the Co-Zr<sub>0.1</sub>-B-O catalyst after CO<sub>2</sub> methanation. Conditions: Co-Zr<sub>0.1</sub>-B-O catalyst 40 mg, cyclohexane 2 mL, 4 MPa CO<sub>2</sub>, 4 MPa H<sub>2</sub>, 180 °C, 12 h. The sample was obtained after releasing the gases of the cooled reactor.

**Table S1.** The representative results of CO<sub>2</sub> methanation at low temperature ( $\leq 250$  °C).

| Entry | Catalyst                                                    | T (°C) | Best data in the Reference                                                                                                                                     | Normalized activity<br>(mmol <sub>CO2</sub> ·g <sub>cat</sub> <sup>-1</sup> ·h <sup>-1</sup> ) | CH <sub>4</sub> % | Ref.      |
|-------|-------------------------------------------------------------|--------|----------------------------------------------------------------------------------------------------------------------------------------------------------------|------------------------------------------------------------------------------------------------|-------------------|-----------|
| 1     | Ru(NC)/CeO <sub>2</sub>                                     | 190    | 7.41×10 <sup>-3</sup> s <sup>-1</sup>                                                                                                                          | 6.8                                                                                            | >98               | [3]       |
| 2     | Rh(3 wt.%)/TiO <sub>2</sub>                                 | 150    | 0.143×10 <sup>-2</sup> mol <sub>CH4</sub> mol <sub>Rh</sub> <sup>-1</sup> s <sup>-1</sup>                                                                      | 1.5                                                                                            | 100               | [4]       |
| 3     | Ru/[BMIM]BF <sub>4</sub> /SiO <sub>2</sub>                  | 250    | 70% (CO <sub>2</sub> conversion)                                                                                                                               | 5.1                                                                                            | 100               | [5]       |
| 4     | RuNPs in [C <sub>8</sub> mim][NfO]                          | 150    | 3.25 h <sup>-1</sup> (84% yield)                                                                                                                               | n/a                                                                                            | 100               | [6]       |
| 5     | Ru/TiO <sub>2</sub> (B)                                     | 160    | 1.5×10 <sup>-2</sup> S <sup>-1</sup>                                                                                                                           | 2.4                                                                                            | 100               | [7]       |
| 6     | RuNPs in [omim][NTf <sub>2</sub> ]                          | 150    | 72 (TON), 69% (yield)                                                                                                                                          | 29.7                                                                                           | 100               | [8]       |
| 7     | Rh-Pd/ $\gamma$ -Al <sub>2</sub> O <sub>3</sub>             | 200    | 0.309 $\mu$ mol g <sub>cat</sub> <sup>-1</sup> s <sup>-1</sup><br>(0.318×10 <sup>-2</sup> mol <sub>CH4</sub> mol <sub>Rh</sub> <sup>-1</sup> s <sup>-1</sup> ) | 1.1                                                                                            | 100               | [9]       |
| 8     | 3Ru-30Ni/Ce <sub>0.9</sub> Zr <sub>0.1</sub> O <sub>2</sub> | 230    | 98.2% (CO <sub>2</sub> conversion)                                                                                                                             | 21.0                                                                                           | 100               | [10]      |
| 9     | Ru/30%CeO <sub>2</sub> /Al <sub>2</sub> O <sub>3</sub>      | 250    | 6.2 mL min <sup>-1</sup> g <sub>cat</sub> <sup>-1</sup>                                                                                                        | 16.6                                                                                           | ≈100              | [11]      |
| 10    | Rh/ $\gamma$ -Al <sub>2</sub> O <sub>3</sub> :Ni/AC         | 125    | 9.5 $\mu$ mol g <sup>-1</sup>                                                                                                                                  | n/a                                                                                            | 100               | [12]      |
| 11    | Co-Zr <sub>0.1</sub> -B-O                                   | 180    |                                                                                                                                                                | 10.7                                                                                           | 97.8              | This work |

The activities of some results are converted to mmol<sub>CO2</sub> · g<sub>cat</sub><sup>-1</sup>·h<sup>-1</sup> based on the data given in the literatures, and the detailed procedures are given below.

n/a represents “not available” because of lacking some key parameter for calculation.

#### Ru(NC)/CeO<sub>2</sub> (Ref. 3):

$$7.41 \times 10^{-3} \text{ s}^{-1} \times 3600 \text{ s/h} \div 101.1 \text{ g/mol}_{\text{Ru}} \times 0.0256 \text{ g}_{\text{Ru}}/\text{g}_{\text{cat}} \times 1000 \text{ mmol/mol} = 6.8 \text{ mmol}_{\text{CO}_2} \cdot \text{g}_{\text{cat}}^{-1} \cdot \text{h}^{-1}$$

#### Rh(3 wt.%)/TiO<sub>2</sub> (Ref. 4):

$$0.143 \times 10^{-2} \text{ mol}_{\text{CH}_4} \text{ mol}_{\text{Rh}}^{-1} \text{ s}^{-1} \times 3600 \text{ s/h} \div 102.9 \text{ g/mol}_{\text{Rh}} \times 0.03 \text{ g}_{\text{Rh}}/\text{g}_{\text{cat}} \times 1000 \text{ mmol/mol} = 1.5 \text{ mmol}_{\text{CO}_2} \cdot \text{g}_{\text{cat}}^{-1} \cdot \text{h}^{-1}$$

#### Ru/[BMIM]BF<sub>4</sub>/SiO<sub>2</sub> (Ref. 5):

$$2400 \text{ h}^{-1} (\text{GHSV}) \times L_{\text{cat}} \div 22.4 \text{ L/mol} \times 15 (\text{CO}_2)\% \times 70 (\text{conv.})\% \div (1 L_{\text{cat}} \times 2200 \text{ g}_{\text{cat}}/\text{L}) \times 1000 \text{ mmol/mol} = 5.1 \text{ mmol}_{\text{CO}_2} \cdot \text{g}_{\text{cat}}^{-1} \cdot \text{h}^{-1}$$

(The catalyst density was not available and was supposed to be the density of SiO<sub>2</sub> support because of the low Ru loading.)

#### Ru/TiO<sub>2</sub> (B) (Ref. 7):

$$1.5 \times 10^{-2} \text{ s}^{-1} \times 1.55 \text{ m}^2 \text{ g}_{\text{cat}}^{-1} \times 0.1739 \times 10^{20} \div (6.02 \times 10^{23} \text{ atom/mol}) \times 1000 \text{ mmol/mol} \times 3600 \text{ s/h} = 2.4 \text{ mmol}_{\text{CO}_2} \cdot \text{g}_{\text{cat}}^{-1} \cdot \text{h}^{-1}$$

#### RuNPs in [omim][NTf<sub>2</sub>] (Ref. 8):

$$72 \text{ mol}_{\text{CH}_4} \text{ mol}_{\text{Ru}}^{-1} \div 101.1 \text{ g/mol}_{\text{Ru}} \div 24 \text{ h} \times 1000 \text{ mmol/mol} = 29.7 \text{ mmol}_{\text{CO}_2} \cdot \text{g}_{\text{cat}}^{-1} \cdot \text{h}^{-1}$$

#### Rh-Pd/ $\gamma$ -Al<sub>2</sub>O<sub>3</sub> (Ref. 9):

$$0.309 \text{ } \mu\text{mol g}_{\text{cat}}^{-1} \text{ s}^{-1} \times 3600 \text{ s/h} \div 1000 \text{ } \mu\text{mol}/\text{mmol} = 1.1 \text{ mmol}_{\text{CO}_2} \cdot \text{g}_{\text{cat}}^{-1} \cdot \text{h}^{-1}$$

(The reaction rate with the unit of  $\mu$ mol g<sub>cat</sub><sup>-1</sup> s<sup>-1</sup> was obtained directly from Table 1 of the Ref. 9)

#### 3Ru-30Ni/Ce<sub>0.9</sub>Zr<sub>0.1</sub>O<sub>2</sub> (Ref. 10):

$$2400 \text{ mL g}^{-1} \text{ h}^{-1} \div 22.4 \text{ mL}/\text{mmol} \times 20\%_{\text{CO}_2} \times 98.2\%_{\text{conv.}} = 21.0 \text{ mmol}_{\text{CO}_2} \cdot \text{g}_{\text{cat}}^{-1} \cdot \text{h}^{-1}$$

#### Ru/30%CeO<sub>2</sub>/Al<sub>2</sub>O<sub>3</sub> (Ref. 11):

$$6.2 \text{ mL min}^{-1} \text{ g}_{\text{cat}}^{-1} \div 22.4 \text{ mL}/\text{mmol} \times 60 \text{ min/h} = 16.6 \text{ mmol}_{\text{CO}_2} \cdot \text{g}_{\text{cat}}^{-1} \cdot \text{h}^{-1}$$

**Table S2.** Impact of Zr content on the structure and performance of the catalysts.

| Catalyst                   | Surface composition (atom%) <sup>a</sup> |     |      |      | S <sub>BET</sub><br>(m <sup>2</sup> g <sup>-1</sup> ) | Catalytic<br>activity <sup>b</sup> |
|----------------------------|------------------------------------------|-----|------|------|-------------------------------------------------------|------------------------------------|
|                            | Co                                       | Zr  | B    | O    |                                                       |                                    |
| Co-B-O                     | 7.7                                      | -   | 3.6  | 88.7 | 18.8                                                  | 0.9                                |
| Co-Zr <sub>0.05</sub> -B-O | 30.4                                     | 1.6 | 14.7 | 53.3 | 32.0                                                  | 8.2                                |
| Co-Zr <sub>0.1</sub> -B-O  | 34.7                                     | 5.1 | 18.9 | 41.3 | 92.4                                                  | 10.7                               |
| Co-Zr <sub>0.3</sub> -B-O  | 16.5                                     | 6.6 | 13.2 | 63.7 | 20.0                                                  | 5.8                                |

<sup>a</sup> The data were from XPS analysis, indicating the atomic percentage in total surface atoms.

<sup>b</sup> The unit of the activity is mmol<sub>CO<sub>2</sub></sub> g<sub>cat</sub><sup>-1</sup> h<sup>-1</sup>, which was obtained at the same condition to that in Figure 1.

**Table S3.** The oxygen states of different catalysts determined by XPS characterization.

| Catalyst                     | O 1s %    |           |      |
|------------------------------|-----------|-----------|------|
|                              | Lattice O | Surface O | B-O  |
| Co-B-O                       | 6.2       | 51.3      | 42.5 |
| Co-Zr <sub>0.05</sub> -B-O   | 45.5      | 41.7      | 12.8 |
| Co-Zr <sub>0.1</sub> -B-O    | 36.2      | 47.7      | 16.1 |
| Co-Zr <sub>0.3</sub> -B-O    | 35.0      | 40.5      | 24.5 |
| Co-Zr <sub>0.1</sub> -B-O-5r | 33.9      | 51.6      | 14.5 |

The data of oxygen states were obtained from the XPS characterization of different catalysts.

**Table S4.** Result of the CO hydrogenation over the Co-Zr<sub>0.1</sub>-B-O catalyst.

| Product selectivity (%) |        |         |                 | CO conversion (%) | Activity (mmol <sub>CO</sub> g <sub>cat</sub> <sup>-1</sup> h <sup>-1</sup> ) |
|-------------------------|--------|---------|-----------------|-------------------|-------------------------------------------------------------------------------|
| methane                 | ethane | propane | CO <sub>2</sub> |                   |                                                                               |
| 26.2                    | 4.3    | 4.4     | 65.1            | 0.7               | 0.4                                                                           |

Conditions: catalyst 40 mg, cyclohexane 2 mL, 4 MPa CO, 4 MPa H<sub>2</sub>, 180 °C, 12 h.

## Reference

1. J. Masa, P. Weide, D. Peeters, I. Sinev, W. Xia, Z. Sun, C. Somsen, M. Muhler and W. Schuhmann, *Adv. Energy Mater.*, 2016, **6**, 1502313.
2. U. B. Demirci and P. Miele, *Phys Chem Chem Phys*, 2010, **12**, 14651.
3. Y. Guo, S. Mei, K. Yuan, D. J. Wang, H. C. Liu, C. H. Yan and Y. W. Zhang, Low-Temperature CO<sub>2</sub> Methanation over CeO<sub>2</sub>-Supported Ru Single Atoms, Nanoclusters, and Nanoparticles Competitively Tuned by Strong Metal–Support Interactions and H-Spillover Effect, *ACS Catal.* 2018, **8**, 7, 6203.
4. A. Karelavic and P. Ruiz, Mechanistic study of low temperature CO<sub>2</sub> methanation over Rh/TiO<sub>2</sub> catalysts, *J. Catal.*, 2013, **301**, 141.
5. X. P. Guo, Z. J. Peng, A. Traitangwong, G. Wang, H. Y. Xu, V. Meeyoo, C. S. Li and S. J. Zhang, Ru nanoparticles stabilized by ionic liquids supported onto silica: highly active catalysts for low-temperature CO<sub>2</sub> methanation, *Green Chem.*, 2018, **20**, 4932.
6. C. I. Melo, D. Rente, M. N. da Ponte, E. Bogel-Lukasik and L. C. Branco, Carbon Dioxide to Methane Using Ruthenium Nanoparticles: Effect of the Ionic Liquid Media, *ACS Sustainable Chem. Eng.*, 2019, **7**, 11963.
7. T. Abe, M. Tanizawa, K. Watanabe and A. Taguchi, CO<sub>2</sub> methanation property of Ru nanoparticle-loaded TiO<sub>2</sub> prepared by a polygonal barrel-sputtering method, *Energy Environ. Sci.*, 2009, **2**, 315.
8. C. I. Melo, A. Szczepanska, E. Bogel-Lukasik, M. Nunes da Ponte and L. C. Branco, Hydrogenation of Carbon Dioxide to Methane by Ruthenium Nanoparticles in Ionic Liquid, *ChemSusChem*, 2016, **9**, 1081.
9. A. Karelavic and P. Ruiz, Improving the Hydrogenation Function of Pd/gamma-Al<sub>2</sub>O<sub>3</sub> Catalyst by Rh/gamma-Al<sub>2</sub>O<sub>3</sub> Addition in CO<sub>2</sub> Methanation at Low Temperature, *ACS Catal.*, 2013, **3**, 2799.
10. X. Shang, D. Deng, X. Wang, W. Xuan, X. Zou, W. Ding and X. Lu, Enhanced low-temperature activity for CO<sub>2</sub> methanation over Ru doped the Ni/Ce<sub>x</sub>Zr<sub>(1-x)</sub>O<sub>2</sub> catalysts prepared by one-pot hydrolysis method, *Int. J. Hydrogen Energy*, 2018, **43**, 7179.
11. S. Tada, O. J. Ochieng, R. Kikuchi, T. Haneda and H. Kameyama, Promotion of CO<sub>2</sub> methanation activity and CH<sub>4</sub> selectivity at low temperatures over Ru/CeO<sub>2</sub>/Al<sub>2</sub>O<sub>3</sub> catalysts, *Int. J. Hydrogen Energy*, 2014, **39**, 10090.
12. C. Swalus, M. Jacquemin, C. Poleunis, P. Bertrand and P. Ruiz, CO<sub>2</sub> methanation on Rh/r-Al<sub>2</sub>O<sub>3</sub> catalyst at low temperature: “In situ” supply of hydrogen by Ni/activated carbon catalyst, *Appl. Catal., B*, 2012, **125**, 41.
